# Supplementary material
Source: PubMed Central journal article supplement (PMC2898422)

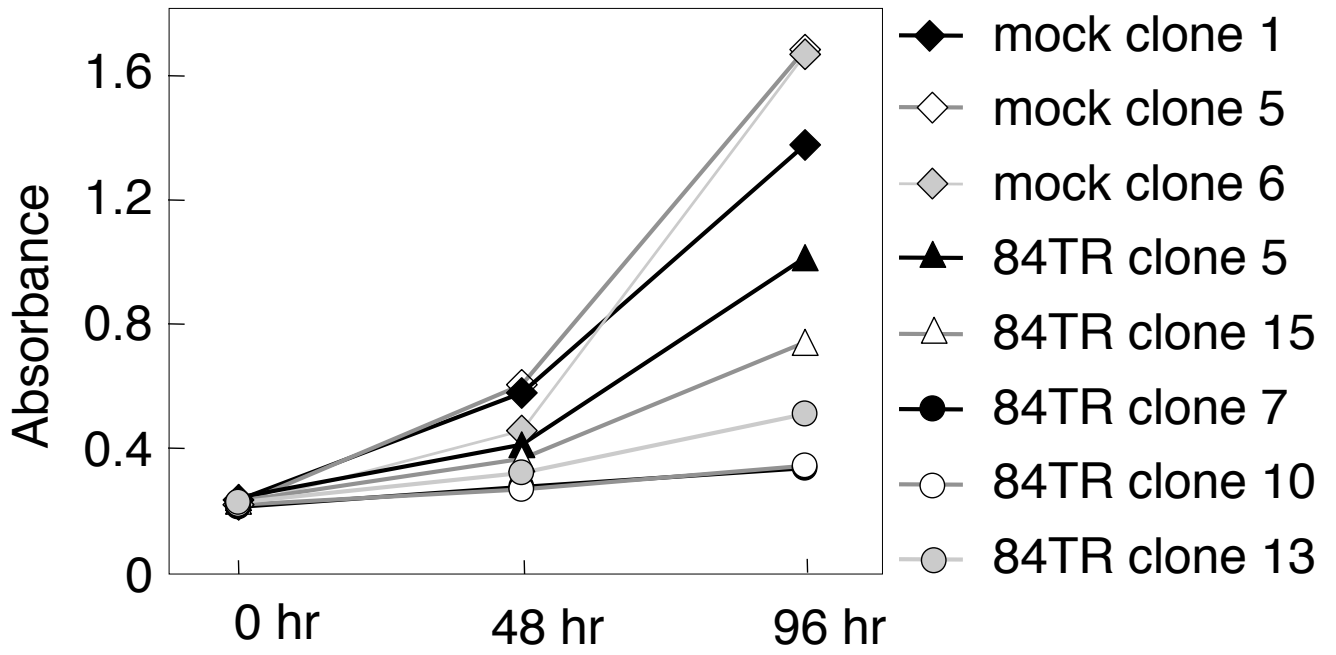

Supplement: supp_M109.082875_jbc.M109.082875-1.pdf [file supp_M109.082875_jbc.M109.082875-1.pdf]
